# Supplementary material for: Pincer Nickel(II) Catalyzed Oxidative Carbonylation of Amines: A Phosgene-Free Synthesis for Isocyanates and Ureas
Source: Research Square preprint supplement (doi:10.21203/rs.3.rs-7143030/v1), 2025-07-23

**Supporting Information**

**Pincer Nickel(II) Catalyzed Oxidative Carbonylation of Amines: A Phosgene-Free Synthesis for Isocyanates and Ureas**

Peter Szwedo1, Raja Shekhar Kondrapolu1, Pradip Munshi2*, & Anindya Ghosh1*

*1Department of Chemistry, University of Arkansas at Little Rock, 2801 South University Avenue, Little Rock, AR 72204, USA*

*2CISCHEM, Centre for Innovation and Sustainable Chemistry, Kalpvruksh Complex, Vadodara, Gujarat 390021, India.*

*corresponding author

E-mail: axghosh@ualr.edu, Phone: 501 569 8827, Fax: 501 569 8838

**Gas Chromatography-Mass Spectrometry**

1-isocyanatopropane S1

1-isocyanatobutane S2

1-isocyanatopentane S3

1-isocyanatohexane S4

1-isocyanatoheptane S5

1-isocyanatoocatane S6

1-isocyanatononane S7

1-isocyanatodecane S8

Isocyanatocyclohexane S9

(isocyanatomethyl)benzene S10

1-( isocyanatomethyl)-4-methylbenzene S11

1-( isocyanatomethyl)-4-methoxybenzene S12

(3-isocyanatopropyl)benzene S13

1-chloro-4-(isocyanatomethyl)benzene S14

1-fluoro-4-(isocyanatomethyl)benzene S15

(1-isocyanatoethyl)benzene S16

1,3-dipropylurea S17

1,3-dibutylurea S18

1,3-dipentylurea S19

1,3-dihexylurea S20

1,3-diheptylurea S21

1,3-dioctylurea S22

1,3-dinonylurea S23

1,3-didecylurea S24

1,3-dicyclohexyllurea S25

1,3-dibenzylurea S26

1,3-bis(4-methylbenzyl)urea S27

1,3-bis(4-methoxybenzyl)urea S28

1,3-bis(3-phenpropyl)urea S29

1,3-bis(4-chlorobenzyl)urea S30

1,3-bis(4-fluorobenzyl)urea S31

1,3-bis(1-phenylethyl)urea S32

**Other Instrumentation**

Ligand FT-IR S33

Ligand 1H NMR and 13C NMR S34

Ligand 1H NMR and 13C NMR S35

Metal Complex ESI-MS (negative mode) S36

Metal Complex FT-IR S37

Metal Complex 1H NMR S38

**Gas Chromatography-Mass Spectrometry**

**S1:** 1-isocyanatopropane

**S2:** 1-isocyanatobutane

**S3:** 1-isocyanatopentane

**S4:** 1-isocyanatohexane

**S5:** 1-isocyanatoheptane

**S6:** 1-isocyanatoocatane

**S7:** 1-isocyanatononane

**S8:** 1-isocyanatodecane

**S9:** isocyanatocyclohexane

**S10:** (isocyanatomethyl)benzene

**S11:** 1-( isocyanatomethyl)-4-methylbenzene

**S12:** 1-(isocyanatomethyl)-4-methoxybenzene

**S13:** (3-isocyanatopropyl)benzene

**S14:** 1-chloro-4-(isocyanatomethyl)benzene

**S15:** 1-fluoro-4-(isocyanatomethyl)benzene

**S16:** (1-isocyanatoethyl)benzene

**S17:** 1,3-dipropylurea

**S18:** 1,3-dibutylurea

**S19:** 1,3-dipentylurea

**S20:** 1,3-dihexylurea

**S21:** 1,3-diheptylurea

**S22:** 1,3-dioctylurea

**S23:** 1,3-dinonylurea

**S24:** 1,3-didecylurea

**S25:** 1,3-dicyclohexylurea

**S26:** 1,3-dibenzylurea

**S27:** 1,3-bis(4-methylbenzyl)urea

**S28:** 1,3-bis(4-methoxybenzyl)urea

**S29:** 1,3-diphenylpropylurea

**S30:** 1,3-bis(4-chlorobenzyl)urea

**S31:** 1,3-bis(4-fluorobenzyl)urea

**S32:** 1,3-bis(1-phenylethyl)urea

**Other Instrumentation**

**S33:** FT-IR of NNN Ligand


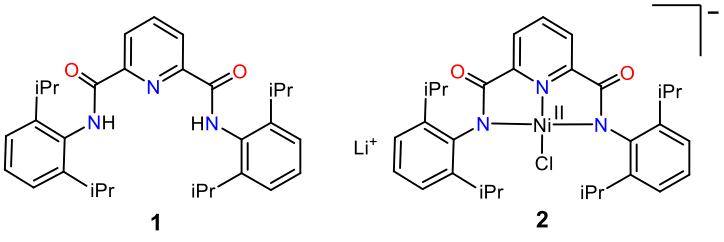


**S34:** 1H NMR of NNN Ligand


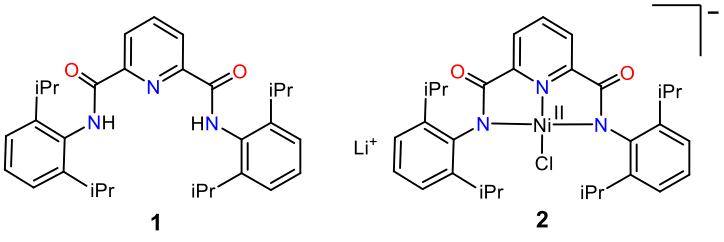


1H NMR (400 MHz, DMSO-*d*6) δ 8.33 (d, *J* = 7.8 Hz, 2H), 8.29 – 8.20 (m, 1H), 7.35 – 7.27 (m, 2H), 7.20 (d, *J* = 7.8 Hz, 4H), 3.06 (h, *J* = 6.9 Hz, 4H), 1.21 – 1.04 (m, 25H).

**S35:** 13C NMR of NNN Ligand


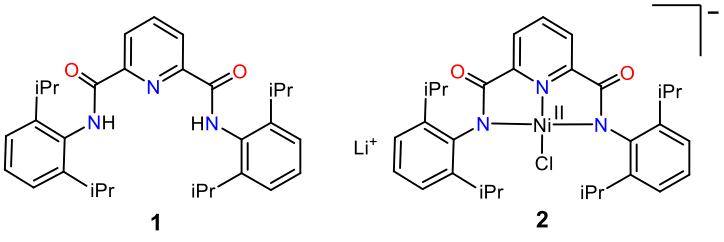


13C NMR (101 MHz, DMSO-*D*6) δ 163.18, 148.96, 146.71, 140.75 132.82, 128.60, 125.43, 123.63, 28.88, 23.77.

**S36:** ESI-MS (negative mode) of nickel (II) complex


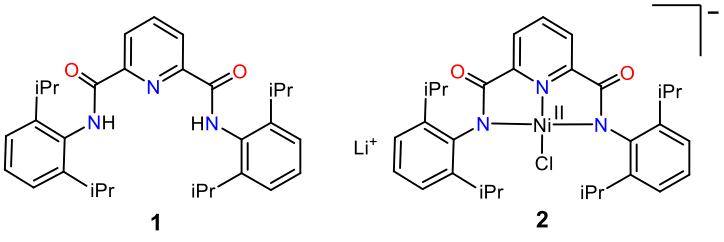


**S37:** FT-IR of nickel (II) complex


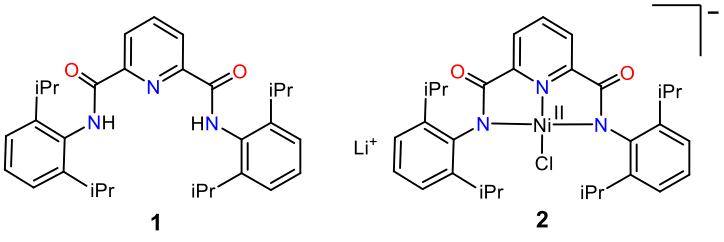


**S38:** 1H NMR of nickel (II) complex


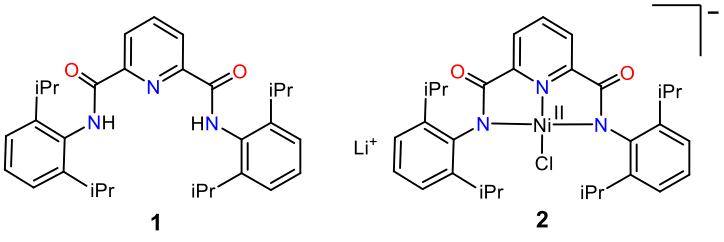

Supplement: Supplementary file 1 [file 94d756ffa5895792b6bda065.docx]
